# Supplementary material
Source: PubMed Central journal article supplement (PMC8178479)
Supplement: mmc1.pdf [file mmc1.pdf]

## **Supplemental Information**

### **A single dose of self-transcribing and replicating RNA-based SARS-CoV-2 vaccine produces protective adaptive immunity in mice**

**Ruklanthi de Alwis, Esther S. Gan, Shiwei Chen, Yan Shan Leong, Hwee Cheng Tan, Summer L. Zhang, Clement Yau, Jenny G.H. Low, Shirin Kalimuddin, Daiki Matsuda, Elizabeth C. Allen, Paula Hartman, Kyoung-Joo Jenny Park, Maher Alayyoubi, Hari Bhaskaran, Adrian Dukanovic, Yanjie Bao, Brenda Clemente, Jerel Vega, Scott Roberts, Jose A. Gonzalez, Marciano Sablad, Rodrigo Yelin, Wendy Taylor, Kiyoshi Tachikawa, Suezanne Parker, Priya Karmali, Jared Davis, Brian M. Sullivan, Sean M. Sullivan, Steve G. Hughes, Pad Chivukula, and Eng Eong Ooi**

# 1 Supplemental Information

2

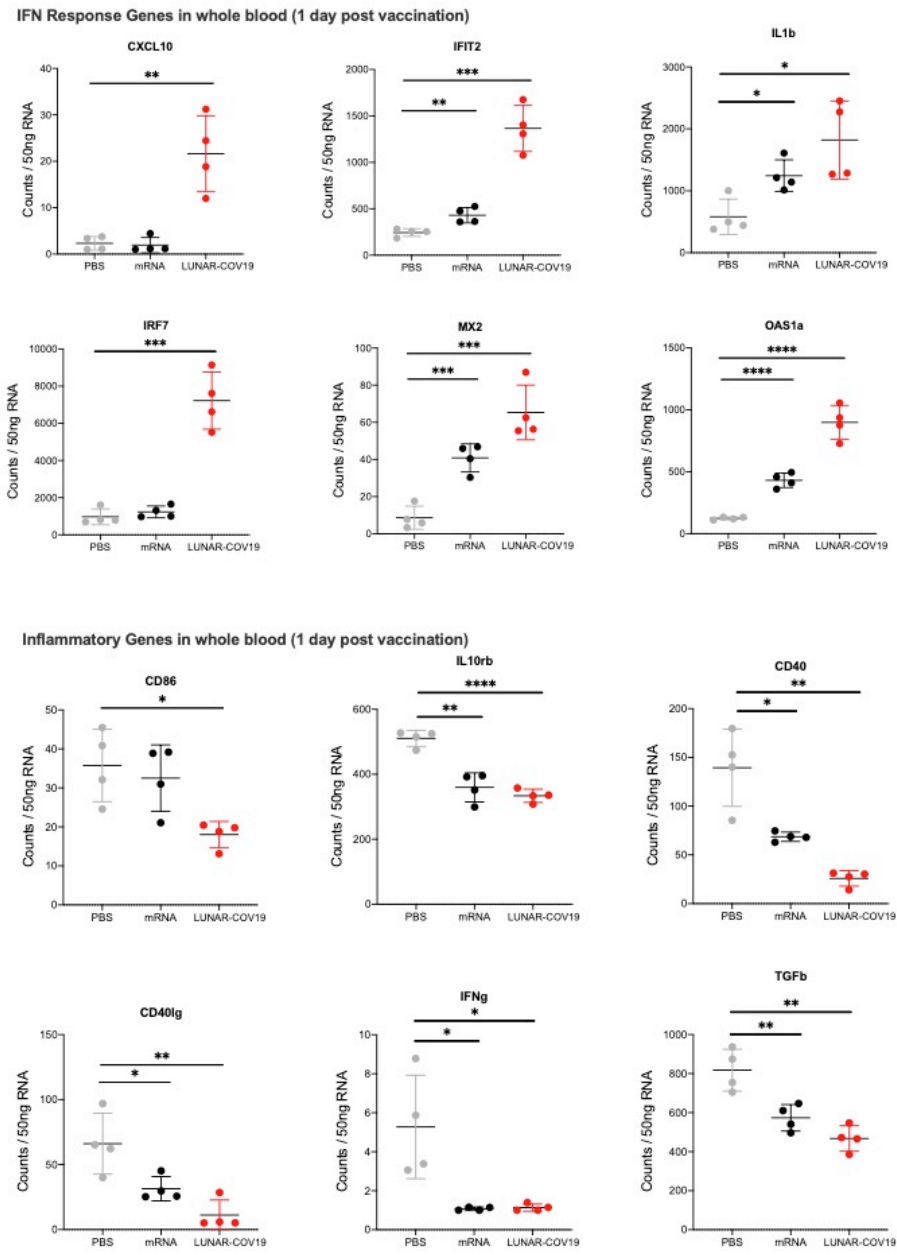

3

4

5 **Figure S1.** Whole blood transcriptomic data at 1-day post-prime vaccination showing  
6 Nanostring counts per 50ng RNA of selected IFN and inflammatory genes.

7

8

9

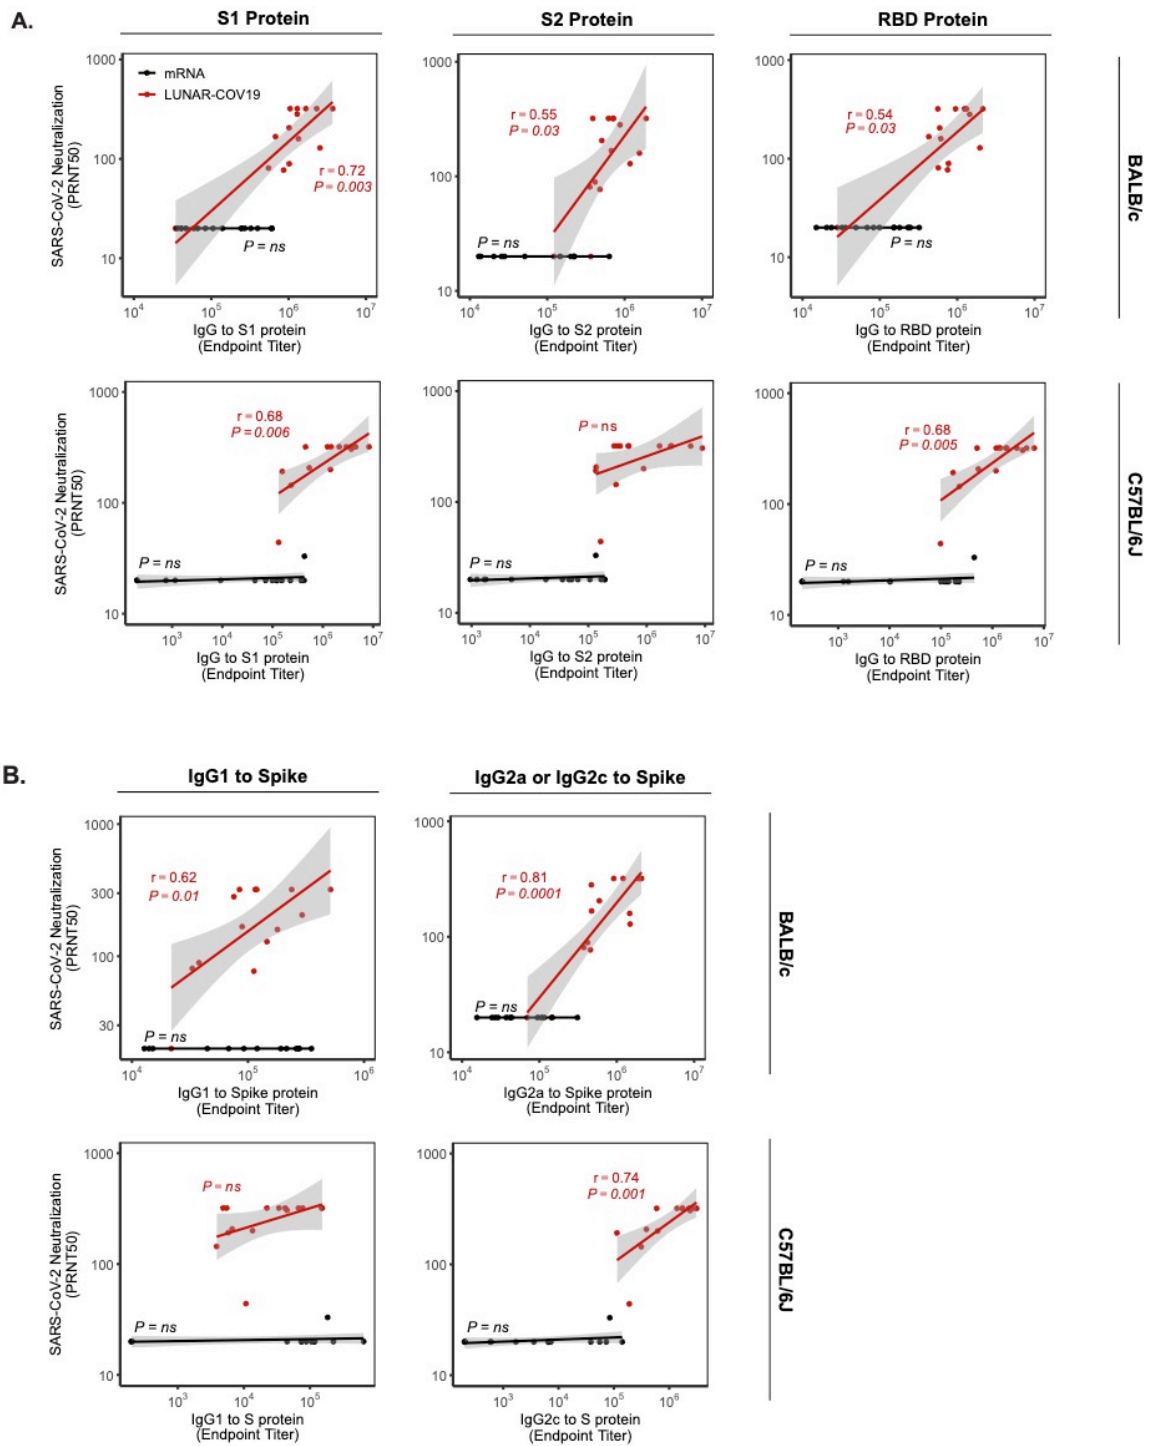

11

12 **Figure S2.** Correlation analysis of live SARS-CoV-2 neutralization against binding IgG and  
 13 IgG subclasses in BALB/c and C57BL/6J mouse strains. **A)** Spearman correlation analysis of  
 14 SARS-CoV-2 neutralization (PRNT50) against total IgG specific to several SARS-CoV2  
 15 antigens, including S, S1, and RBD recombinant proteins. **B)** Spearman correlation analysis  
 16 of SARS-CoV-2 neutralization (PRNT50) against SARS-CoV2 S-specific IgG subclasses  
 17 (IgG1 and IgG2a or IgG2c).

18

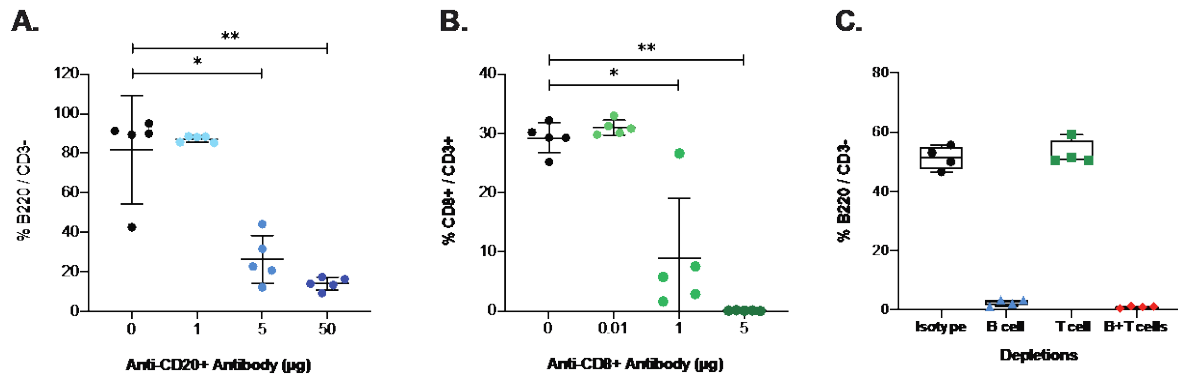

20

21 **Figure S3.** Optimization and confirmation of B cell and/or T cell depletions in hACE2 mice.22 **A)** B cells were successfully depleted by treating hACE mice with 1, 5 or 50 μg of anti-CD2023 antibody or IgG2b mouse isotype control (i.e. 0 μg). **B)** T cells were depleted by treating with24 0.01, 1 or 5 μg of anti-CD8 antibody or IgG2b mouse isotype control (i.e. 0 μg). **C)**

25 successful depletion of B cells prior to vaccination and SARS-CoV-2 challenge.

26

27

28 **Table S1. SARS-CoV-2 specific binding and neutralizing antibody in convalescent**  
 29 **COVID-19 patients.**

| Patient Num | COVID-19 Disease severity | SARS-CoV-2 virus Neutralization (PRNT50) | IgG to SARS-CoV-2 Spike (Endpoint titer) |
|-------------|---------------------------|------------------------------------------|------------------------------------------|
| 1           | moderate                  | 239                                      | 74976                                    |
| 2           | mild                      | 36                                       | 129499                                   |
| 3           | mild                      | 198                                      | 1325961                                  |
| 4           | mild                      | 397                                      | 260182                                   |
| 5           | mild                      | 53                                       | 10519                                    |
| 6           | mild                      | 31                                       | 13495                                    |
| 7           | severe                    | 403                                      | 231718                                   |
| 8           | mild                      | 294                                      | 123996                                   |
| 9           | mild                      | 142                                      | 38998                                    |
| 10          | moderate                  | 638                                      | 924656                                   |
| 11          | mild                      | 12                                       | 13364                                    |
| 12          | mild                      | 104                                      | 111612                                   |
| 13          | mild                      | 483                                      | 209783                                   |
| 14          | mild                      | 65                                       | 38959                                    |
| 15          | mild                      | 527                                      | 668338                                   |
| 16          | mild                      | 17                                       | 30992                                    |
| 17          | mild                      | 173                                      | 3953089                                  |
| 18          | mild                      | 172                                      | 53124                                    |
| 19          | mild                      | 34                                       | 28976                                    |
| 20          | mild                      | 16                                       | 17408                                    |
| 21          | mild                      | 218                                      | 1247821                                  |
| 22          | mild                      | 33                                       | 13099                                    |
| 23          | mild                      | 101                                      | 293233                                   |
| 24          | mild                      | 91                                       | 123059                                   |
| 25          | mild                      | 308                                      | 173622                                   |
| 26          | mild                      | 24                                       | 89434                                    |
| 27          | mild                      | 76                                       | 60097                                    |
| 28          | mild                      | 53                                       | 311261                                   |
| 29          | mild                      | 216                                      | 55180                                    |
| 30          | mild                      | 52                                       | 2877451                                  |
| 31          | severe                    | 352                                      | 1322478                                  |
| 32          | mild                      | 20                                       | 92233                                    |
| 33          | moderate                  | 374                                      | 437878                                   |
| 34          | moderate                  | 523                                      | 173329                                   |
| 35          | moderate                  | 1818                                     | 2013540                                  |
| 36          | severe                    | 487                                      | 187322                                   |
| 37          | severe                    | 309                                      | 166749                                   |
| 38          | mild                      | 212                                      | 134671                                   |
| 39          | mild                      | 257                                      | 64057                                    |
| 40          | severe                    | 699                                      | 474792                                   |
| 41          | Severe                    | 712                                      | 2069779                                  |
| 42          | mild                      | 44                                       | 7300                                     |
| 43          | severe                    | 424                                      | 169514                                   |
| 44          | severe                    | 1521                                     | 189268                                   |
| 45          | mild                      | 29                                       | 922536                                   |
| 46          | mild                      | 127                                      | 54089                                    |
| 47          | mild                      | 192                                      | 59138                                    |
| 48          | mild                      | 253                                      | 142354                                   |
| 49          | mild                      | 407                                      | 654894                                   |
| 50          | Asymptomatic              | 43                                       | 53462                                    |

|    |              |     |        |
|----|--------------|-----|--------|
| 51 | Asymptomatic | 171 | 15396  |
| 52 | mild         | 59  | 363930 |
| 53 | Asymptomatic | 148 | 20269  |
| 54 | Severe       | 477 | 233143 |

30  
31
